# Supplementary material
Source: PubMed Central journal article supplement (PMC8768030)

---

**Supplementary information**

---

***PPIL4* is essential for brain angiogenesis and implicated in intracranial aneurysms in humans**

---

In the format provided by the authors and unedited

# Supplementary Fig.1

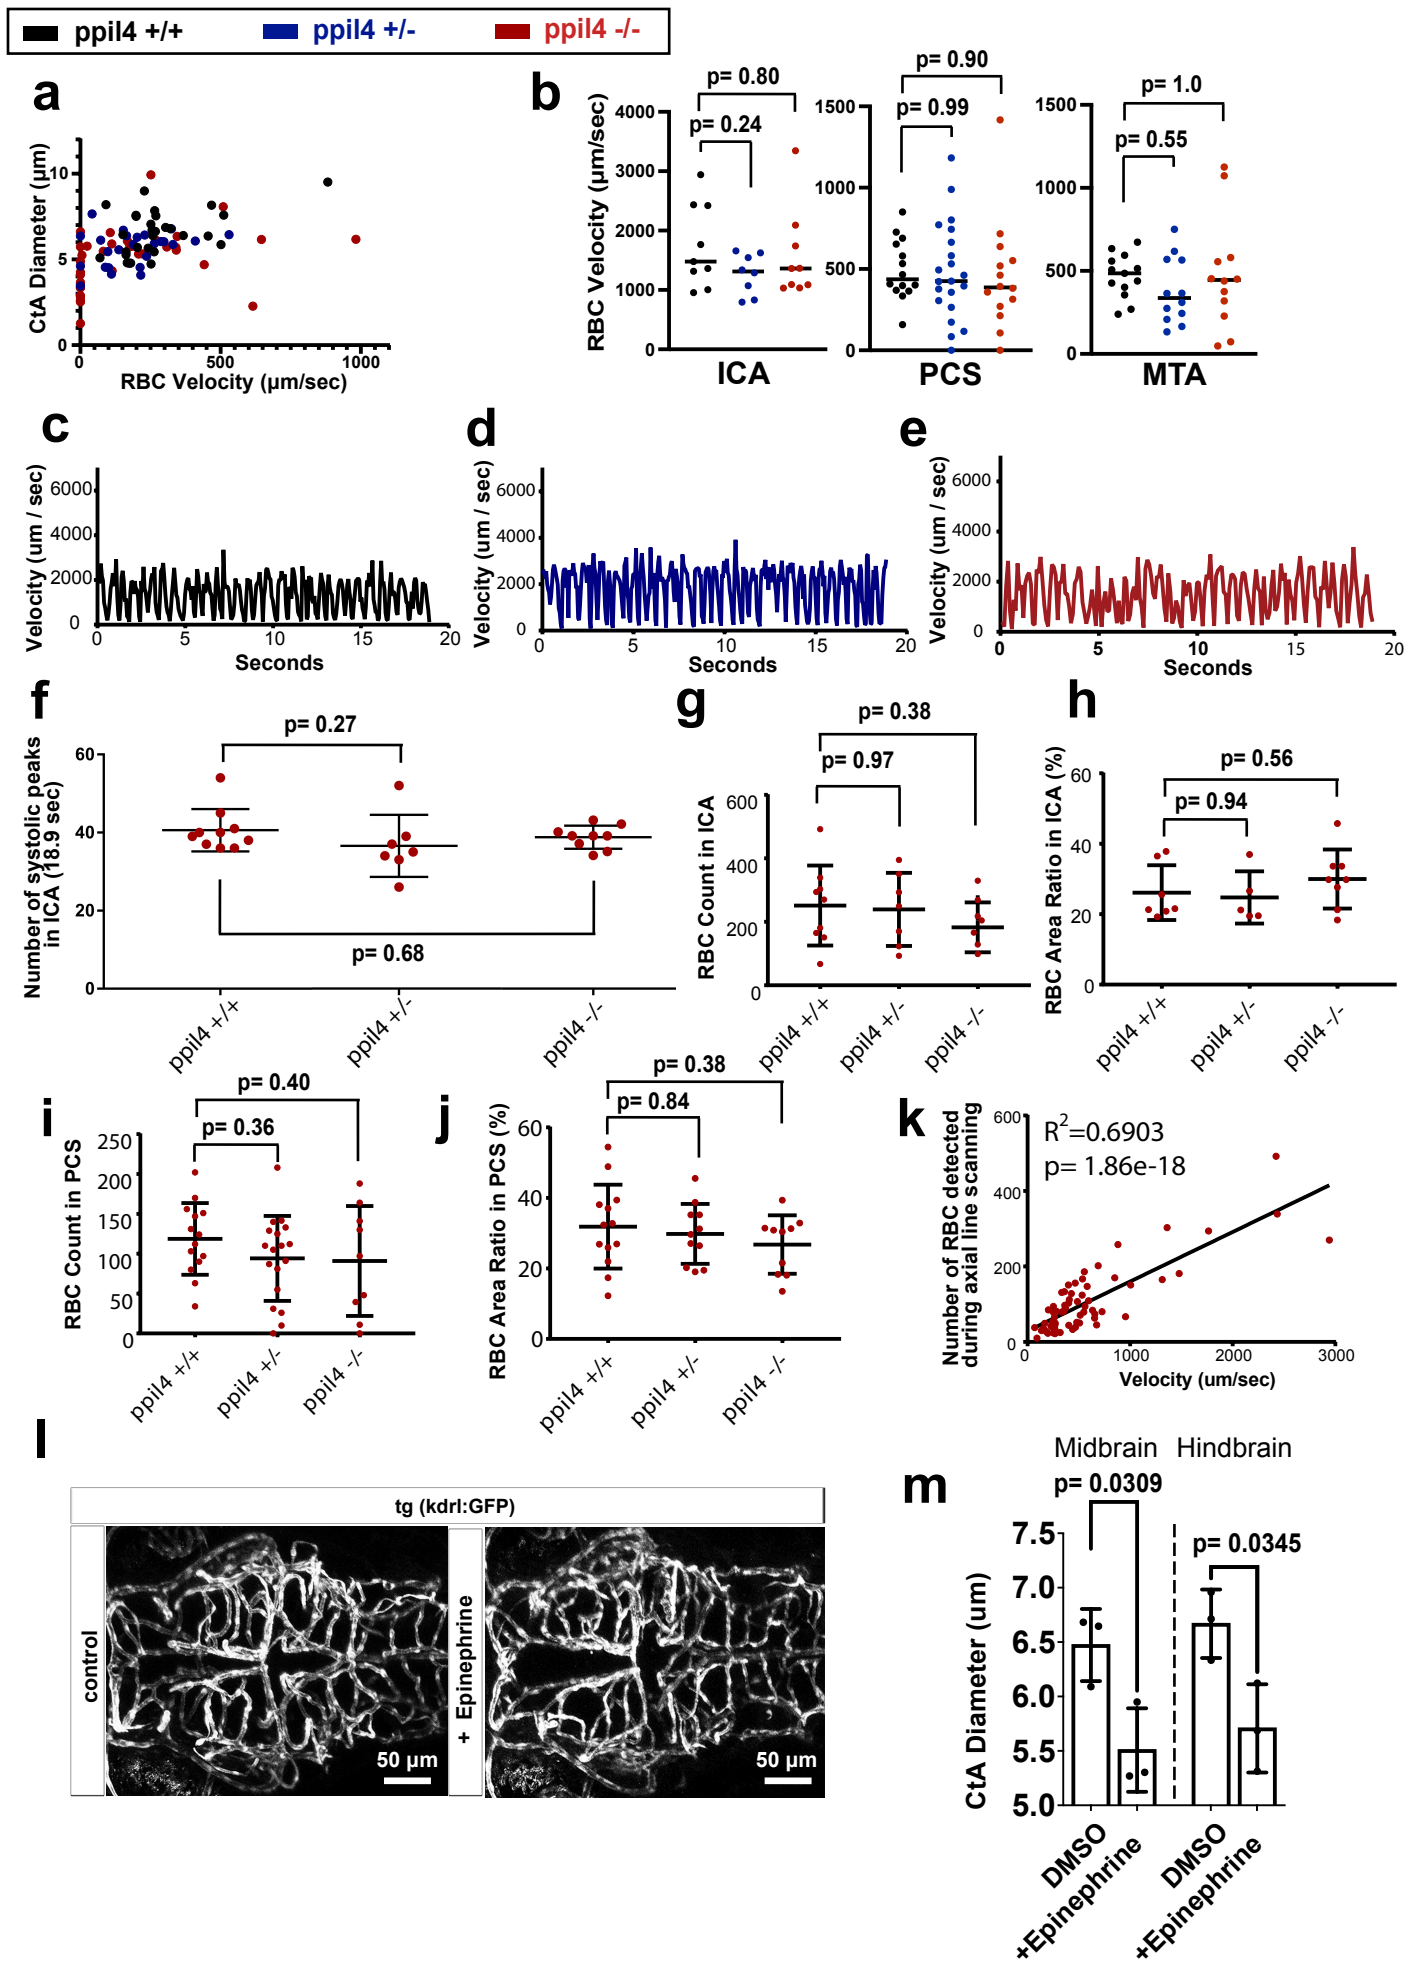

**Supplementary Figure 1: Impaired blood flow in central arteries is not due to systemic hemodynamic defects.**

**a**, Scatter plot demonstrating the relationship between diameter and red blood cell (RBC) velocity in midbrain CtAs of 2.5 dpf *ppil4*<sup>+/+</sup> (n=28), *ppil4*<sup>+/-</sup> (n=37), and *ppil4*<sup>-/-</sup> (n=26). **b**, RBC velocity in internal carotid artery (ICA), n= 9, 8, 9; posterior communicating segment (PCS), n=14, 21, 14; and metencephalic artery (MTA), n= 13, 12, 12 for *ppil4*<sup>+/+</sup>, *ppil4*<sup>+/-</sup> and *ppil4*<sup>-/-</sup> respectively. **c-e** Representative time-velocity plots showing RBC-velocity in ICA. **f**, Systolic peaks in ICA, n= 10, 7, 9 for *ppil4*<sup>+/+</sup>, *ppil4*<sup>+/-</sup> and *ppil4*<sup>-/-</sup> respectively. **g**, Comparison of the RBC count in ICA, n= 9, 7, 7; **h**, RBC area ratio in ICA n= 7, 5, 8; **i**, RBC count in PCS, n= 14, 18, 9; **j**, RBC area ratio in PCS, n= 13, 11, 10 for *ppil4*<sup>+/+</sup>, *ppil4*<sup>+/-</sup> and *ppil4*<sup>-/-</sup> respectively. **k**, Linear regression analysis demonstrating the relationship between the RBC-velocity and number of RBCs identified in the kymograph in *ppil4*<sup>+/+</sup> embryos, n= 68. **l,m**, Brain vasculature of 3dpf wildtype control and embryos treated with 0.2mM epinephrine (**l**), and comparison of the average diameter of the midbrain and hindbrain central arteries (**m**), n=3 per genotype. Individual values shown with scatter dot plot and median in **b**. Data presented as individual values and mean with standard deviation (SD) in **f-j**; and scatter plot with mean and SD in **m**. Statistical tests: (**b**, **f-j**) One-way ANOVA with Dunnett's multiple comparison, (**k**) Linear regression, (**m**) Two-tailed t-test.

# Supplementary Fig.2

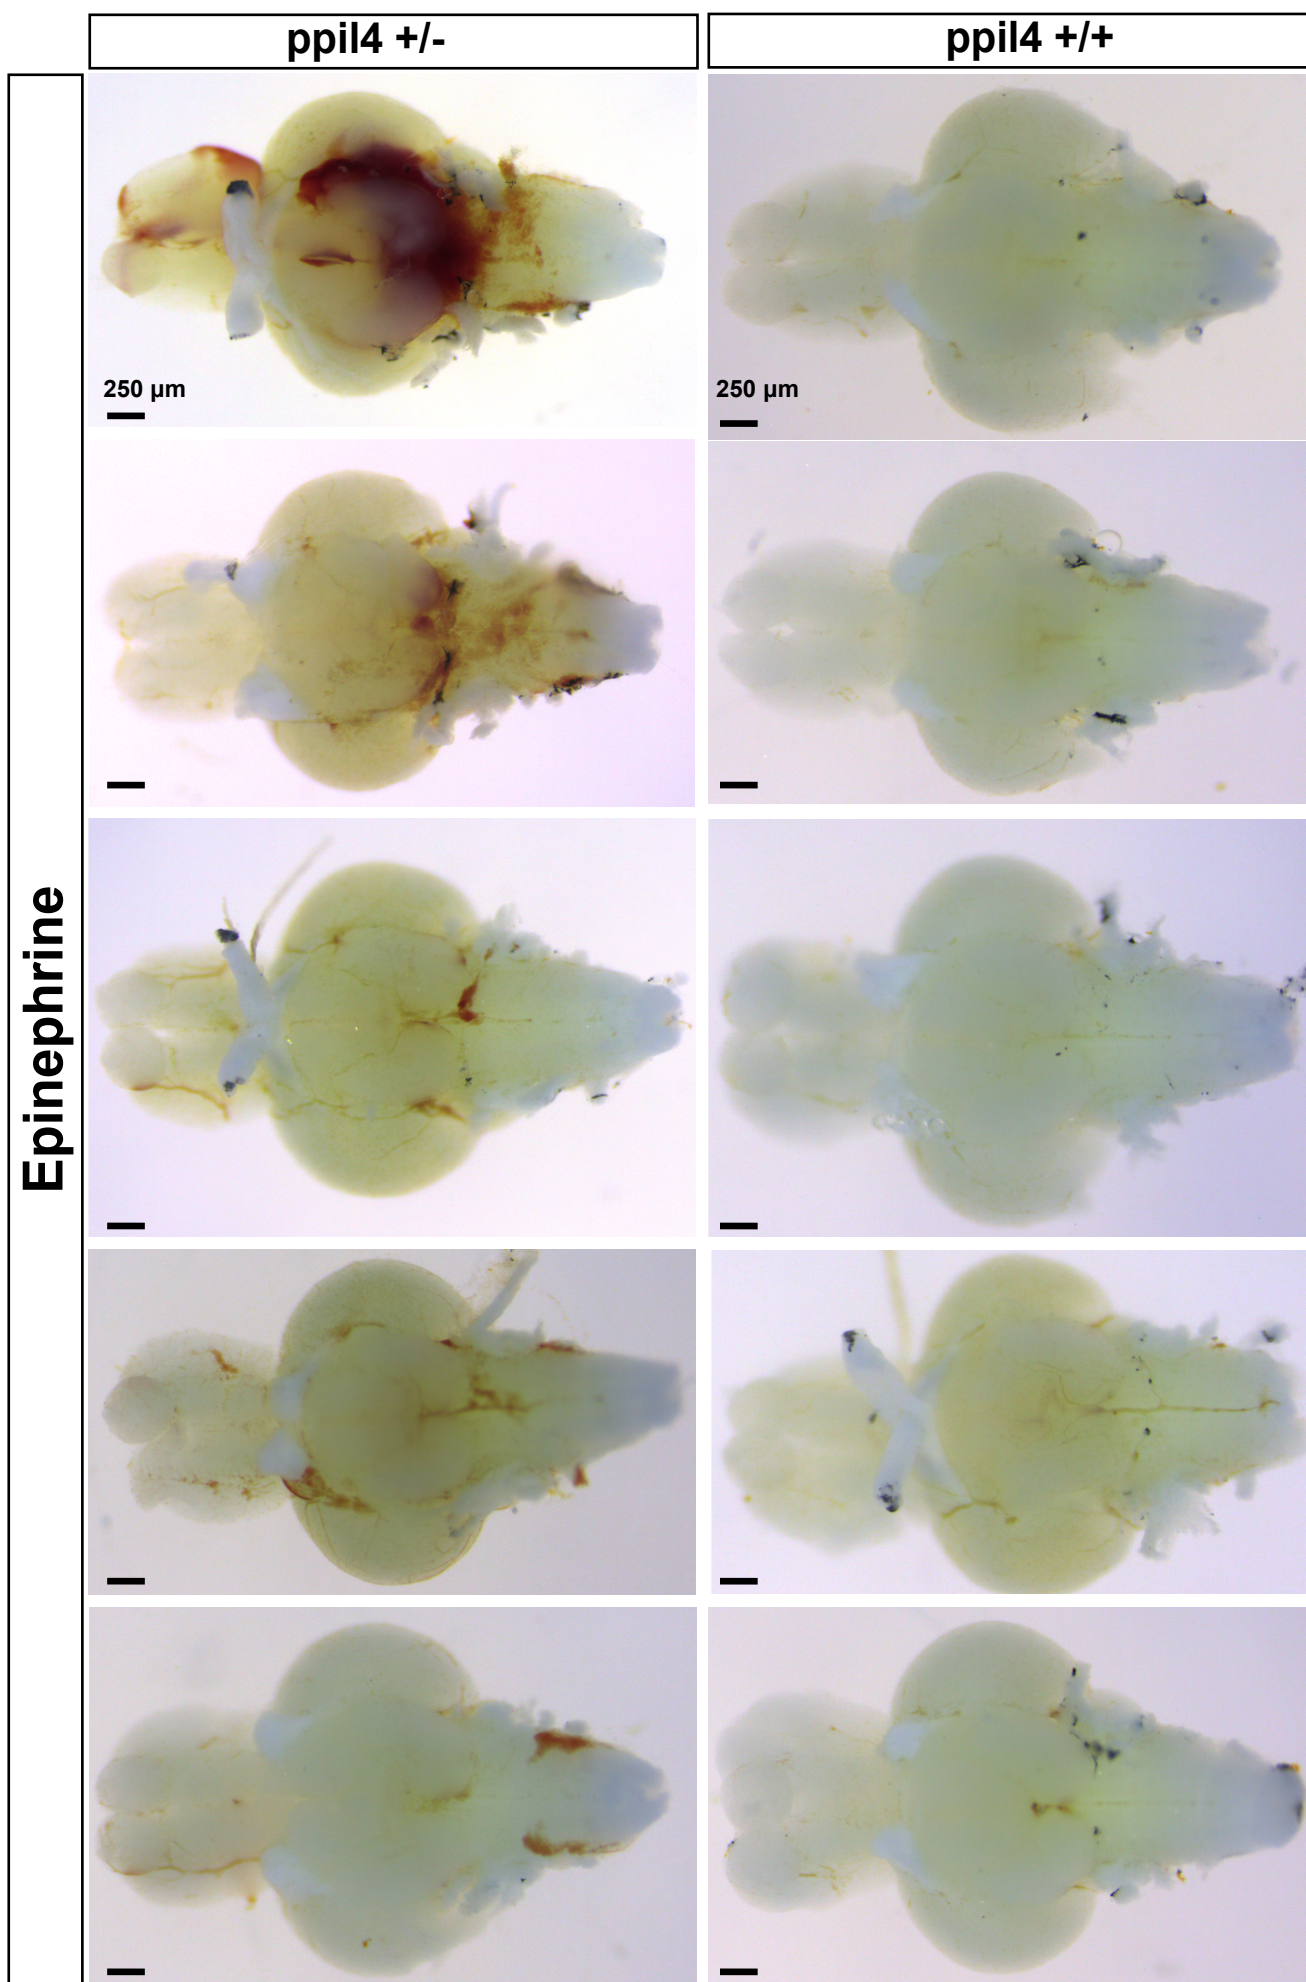

**Supplementary Figure 2: Hemodynamic stress leads to intracranial hemorrhage in adult *ppil4*<sup>+/-</sup> zebrafish.**

Bright-field images of 5 representative wild type (n=19) (left) and *ppil4*<sup>+/-</sup> (n=51) (right) zebrafish brains, ventral view. Administration of 0.5 mg/kg epinephrine in Ringer solution via retro-orbital injection in 3-month-old zebrafish in the *tg(kdrl:gfp;gatal:dsred)* background resulting in intracranial hemorrhage (black arrows) and dilation in circle of Willis vessels. Scale bar: 250  $\mu$ m.

# Supplementary Fig.3

**a**

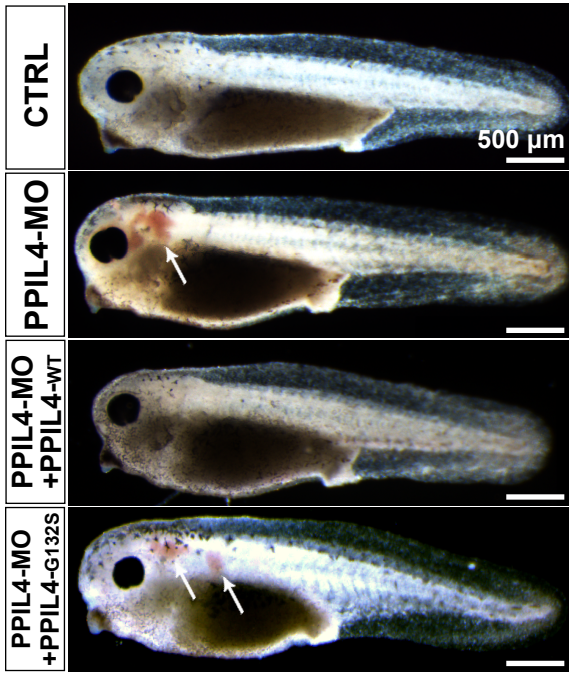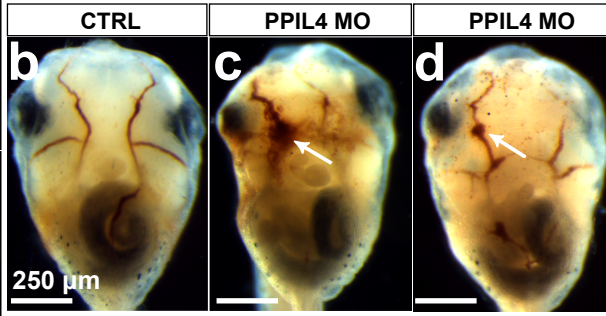

**e**

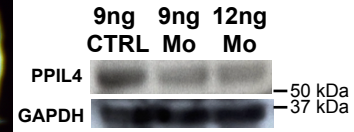

**f**

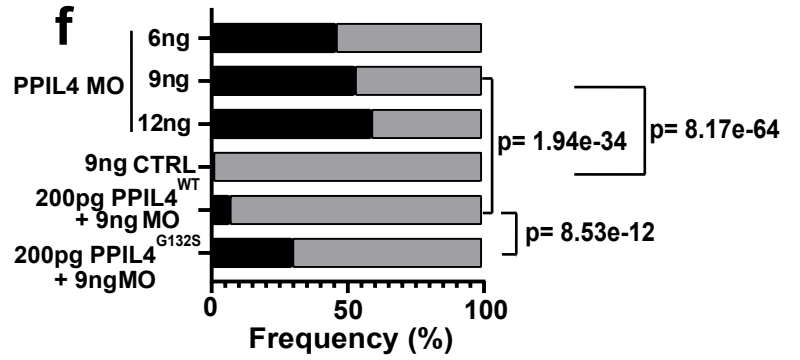

**CTRL MO**

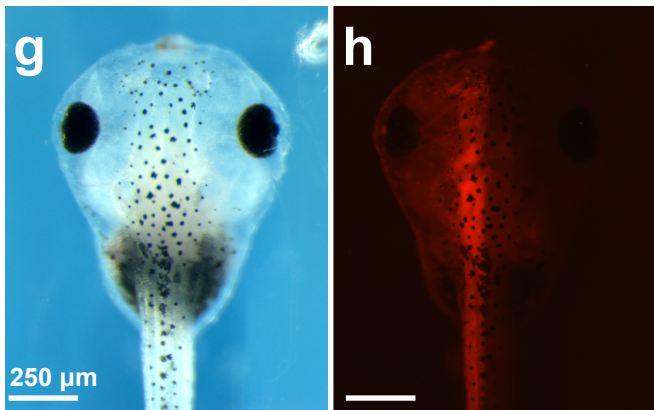

**PPIL4 MO**

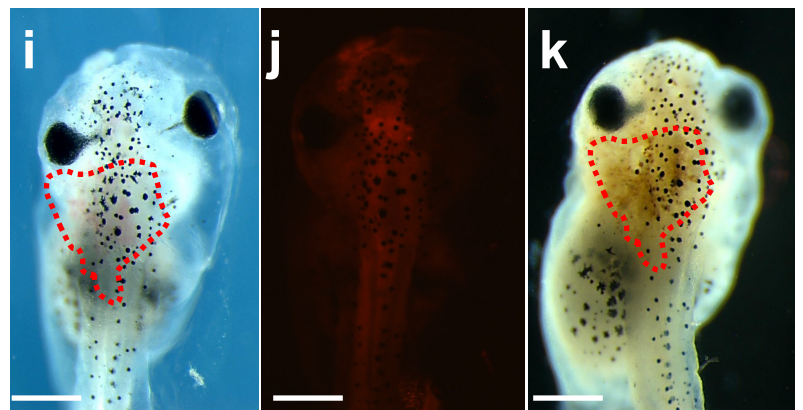

**Supplementary Figure 3: Downregulation of *PPIL4* results in cerebrovascular simplification and hemorrhage in *Xenopus tropicalis*.**

**a**, Lateral view of stage 39 embryos demonstrating cerebral hemorrhage upon injection of *ppil4* translational Morpholino (MO) (but not of control morpholino), or co-injection of 200 pg human mRNA harboring the *PPIL4*<sup>G132S</sup> mutation (but not *PPIL4*<sup>WT</sup>) at the one-cell stage. Arrows: Hemorrhage. **b-d**, Images of embryos treated with o-dianisidine, showing hemorrhage site in *PPIL4*-MO (right) but not in control-MO (left) injected embryos; stage 46, ventral view. **e**, Western blot analysis of whole embryos injected with 9 ng or 12 ng *ppil4* MO or control, data normalized with GAPDH, n=2 sets of biological replicates. **f**, Quantification of cerebral hemorrhage after MO and/or mRNA construct injection at the one-cell stage. n= 258, 390, 300, 432, 274, 279 embryos for 6, 9, 12 ng *ppil4* MO, 9 ng ctrl MO, 9 ng *ppil4* MO + 200 pg *PPIL4*<sup>WT</sup>, 9 ng *ppil4* MO + 200pg *PPIL4*<sup>G132S</sup>, respectively. **g-k**, Dorsal view of stage 46 *X. tropicalis* embryos, injected either with 9 ng control morpholino (**g** and **h**), or with 9 ng *ppil4* MO (**i-k**) to one side of embryos at the two-cell stage. Mini-rubi (red) used as tracer and co-injected with morpholino, injected side shown with fluorescent microscopy. **k**, O-dianisidine staining of the embryo shown in (**i**). Red dashed line encircling hemorrhagic area. Statistical tests: (**f**) Pairwise Chi-Squared test with FDR correction. Scale bar: 500 μm in **a**, and 250 μm in **b,g-k**

Supplementary Fig.4

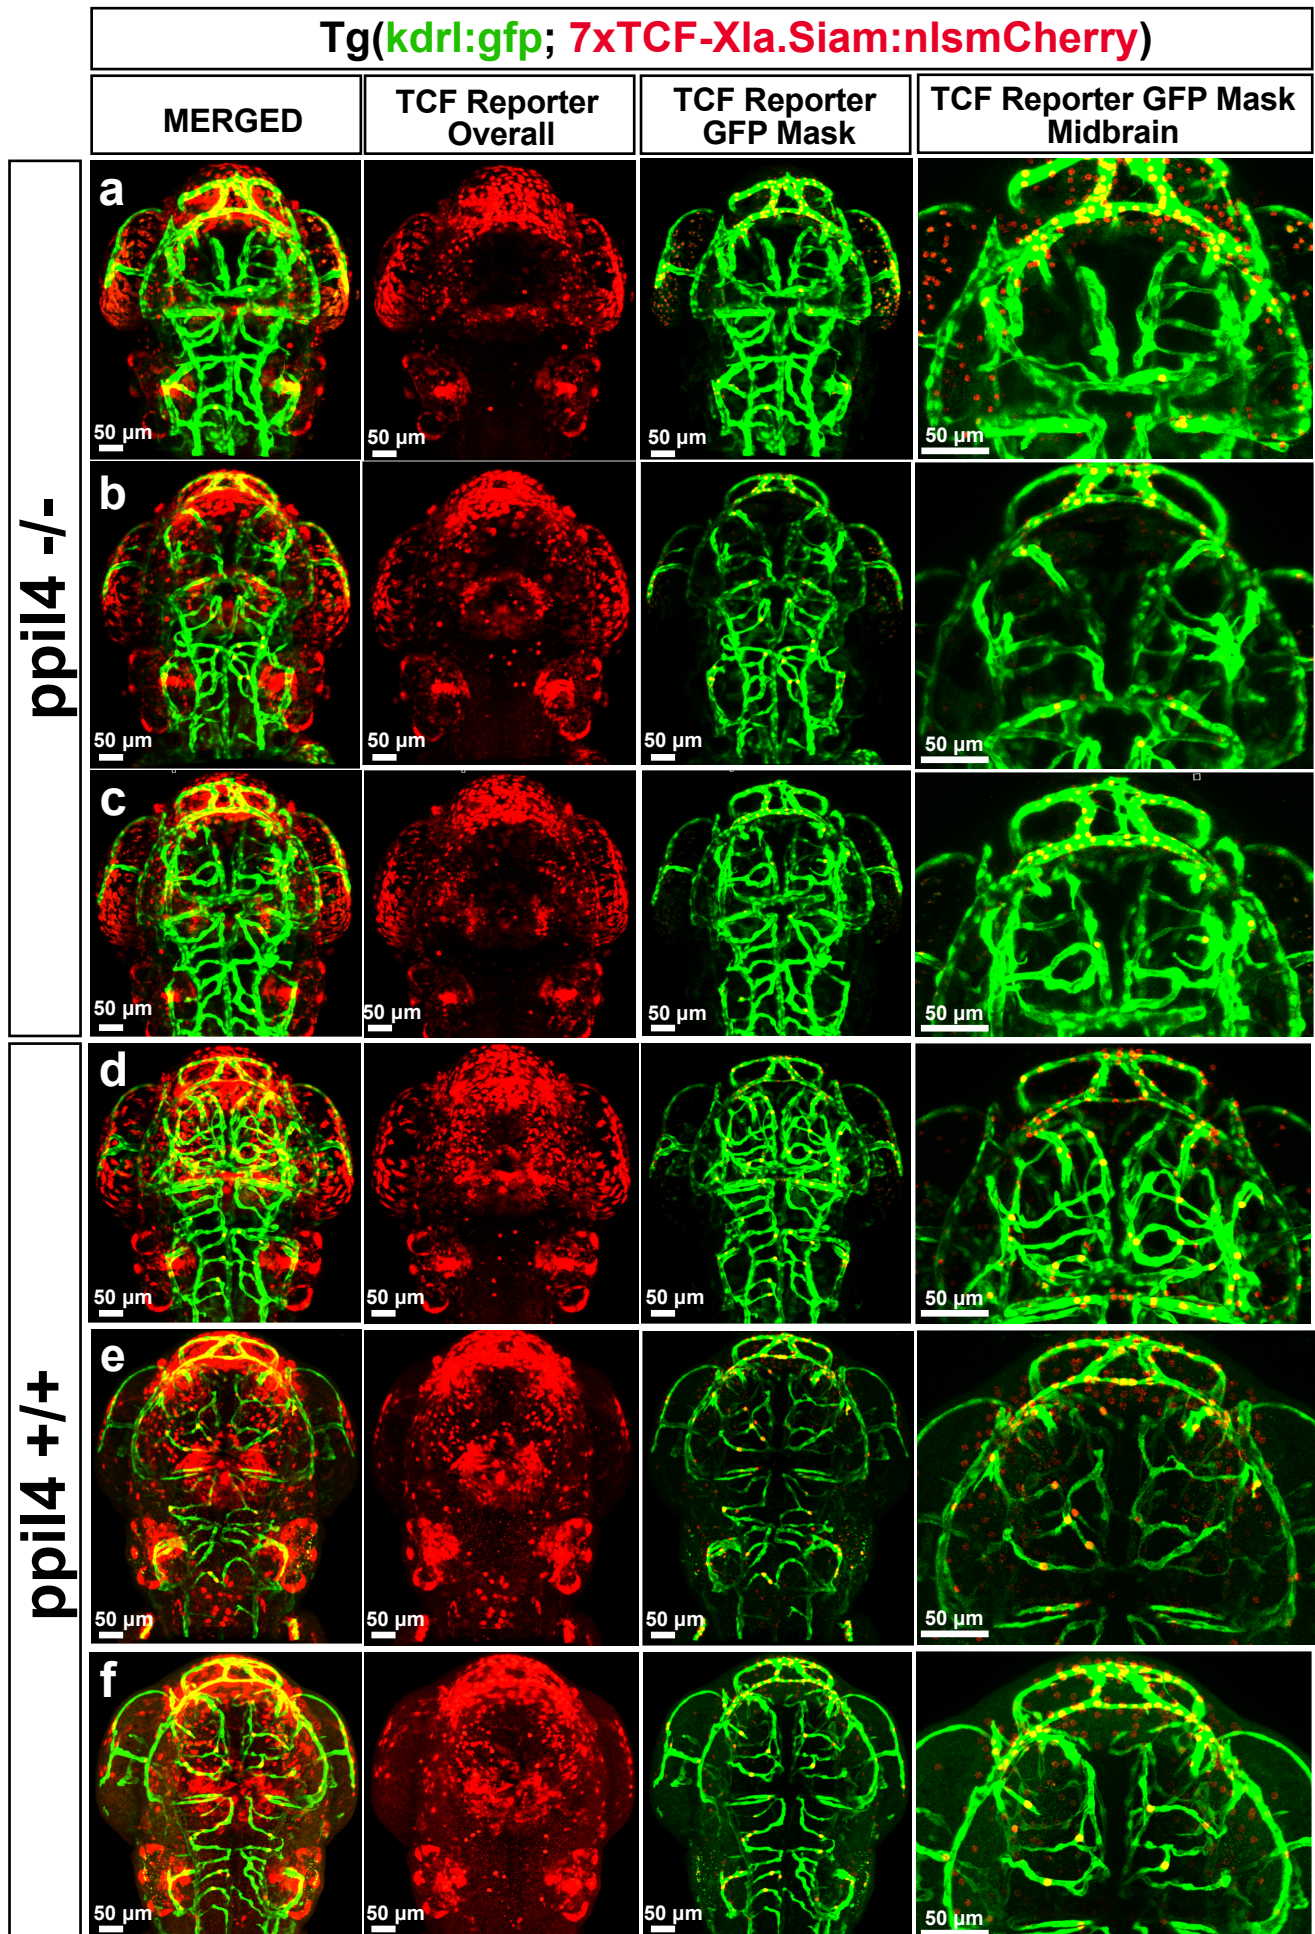



**Supplementary Figure 4: *ppil4* depletion leads to impaired Wnt signaling activation in zebrafish brain parenchyma and midbrain CtAs at 60hpf.**

**a-c**, Maximum intensity projection (MIP) of confocal z-stack images of three representative 60 hpf *ppil4*<sup>-/-</sup> (n=11) and **d-f**, *ppil4*<sup>+/+</sup> (n=10) zebrafish embryos in double transgenic *Tg(kdrl:gfp; 7xTCF-Xla.Siam:nlsMCherry)* background to visualize Wnt signaling activity (red) and endothelial cells (*green*) (dorsal-view; caudal facing up). The TCF reporter signal, quantified using the Spots application in Imaris, shows loss of TCF reporting cells in brain parenchyma and midbrain CtAs of *ppil4*<sup>-/-</sup> embryos. Endothelial specific Wnt-activation is calculated using Spots-Mask for the GFP channel. See methods for details of image processing and assembly.

# Supplementary Fig.5

**a**

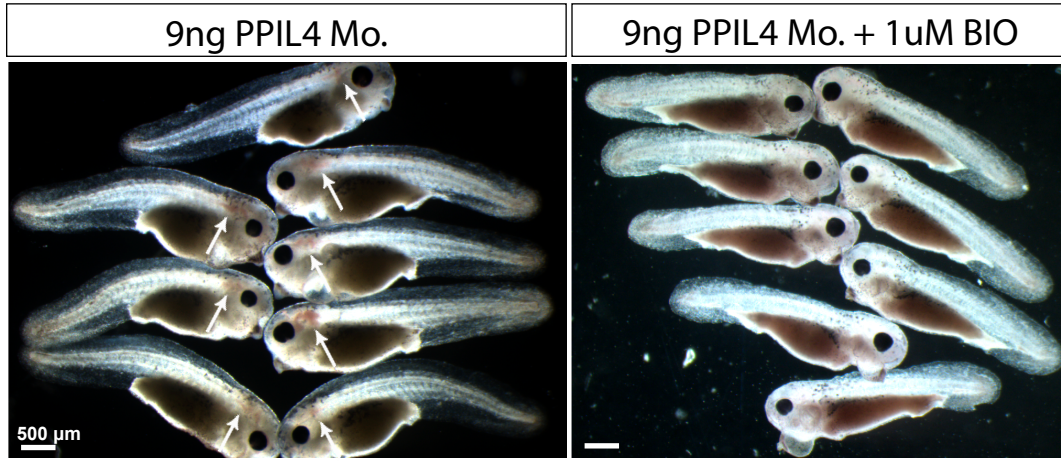

**b**

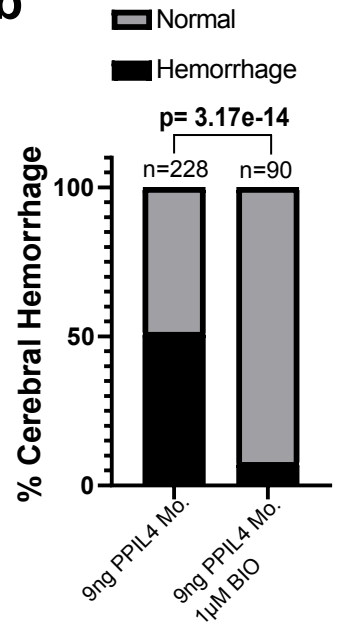

**Supplementary Figure 5: Restoring Wnt signaling activation prevents cerebral hemorrhage in *X. tropicalis* embryos.**

**a**, Lateral view of stage 39 (3 dpf) embryos demonstrating cerebral hemorrhage (arrow) in embryos injected with 9 ng *ppil4* translational MO at the one-cell stage (n=228) (left) and rescue of cerebral hemorrhage upon treatment with the WNT activator 6-bromoindirubin-3'-oxime [BIO] (1  $\mu$ M) (n=90) (right). **b**, Quantification and comparison of cerebral hemorrhage ratio in **(a)**. Statistical tests performed: Chi-squared test. Scale bar: 500  $\mu$ m

# Supplementary Fig.6

## Original Gel Images for Supplementary Fig.3e

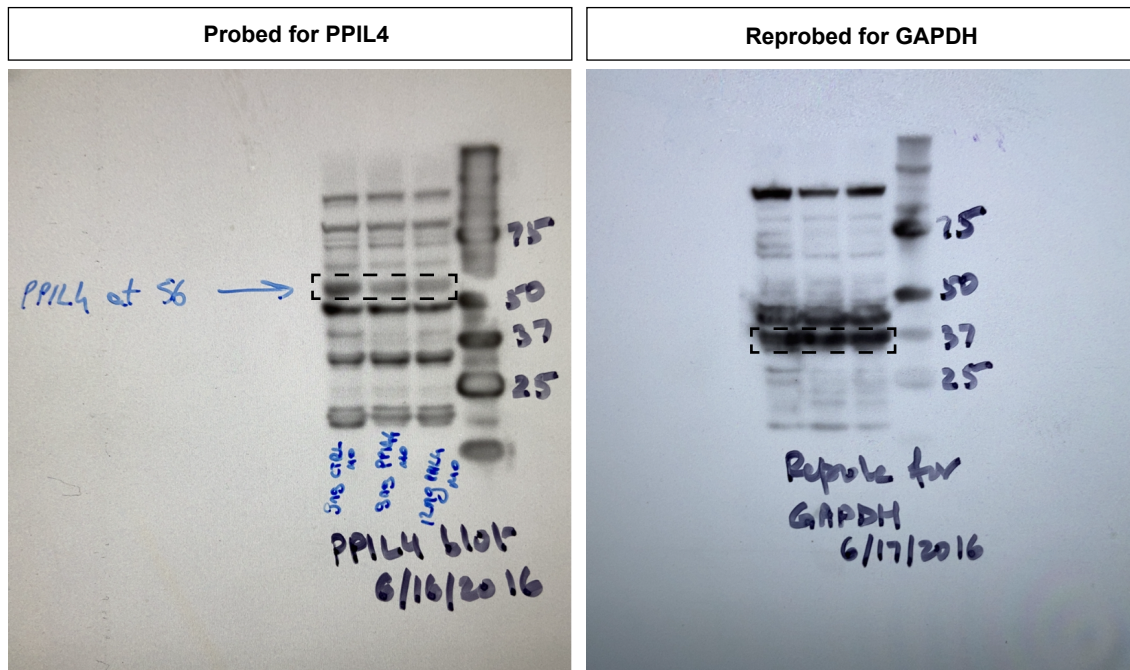

Supplement: NIHMS1765425-supplement-Barak_2021_Suppl_Info.pdf [file NIHMS1765425-supplement-Barak_2021_Suppl_Info.pdf]
